# Supplementary material for: The street, an area exposed to earthquakes (the Lorca case, Spain 2011)
Source: Copernicus journal article supplement (doi:10.5194/nhess-2016-115), 2016-05-10
Supplement: Supplementary file [file nhess-2016-115-RC2-supplement.pdf]

Spelling and grammar mistakes:

Line 12: methodology

Line 13: to the Lorca case

Line 14: individual exposure levels

Line 26: Instituto (remove "I")

Line 27: had not experienced

Line 48: leads us to

Line 50/51: aims to study

Line 58: Coburn (not Coburn, also correct reference in line 670)

Line 72: heritage, notably dwellings, in

Line 88: vulnerable (instead of fragile)

Line 108: Darfield (Canterbury, New Zealand) : **not United Kingdom!**

Line 139: and the following

Line 406: (remove "yet")

Line 470: Furthermore, an in-depth analysis
